# Supplementary material
Source: HighWire-hosted journal article supplement (https://www.jneurosci.org/highwire/filestream/599770/field_highwire_adjunct_files/6/Table_S2.pdf)
Supplement: Table_S2.pdf [file Table_S2.pdf]

## Supplemental Table 2.

**A list of cells that showed resumed respiration phase-locked firing after ipsi-nostril obstruction in each rat**

| <u>Rats</u> | <u>Cells</u> | <u>Reappearance</u> <sup>※1</sup> | <u>Rats</u> | <u>Cells</u> | <u>Reappearance</u> |
|-------------|--------------|-----------------------------------|-------------|--------------|---------------------|
| #26         | 1            | N                                 | #32         | 1            | N                   |
| #27         | 1            | Y                                 |             | 2            | Y                   |
|             | 2            | Y                                 |             | 3            | Y                   |
|             | 3            | Y                                 |             | 4            | N                   |
|             | 4            | Y                                 | #33         | 1            | N                   |
| #28         | 1            | N                                 |             | 2            | N                   |
|             | 2            | Y                                 |             | 3            | N                   |
|             | 3            | N                                 |             | 4            | N                   |
|             | 4            | N                                 |             | 5            | N                   |
| #29         | 1            | Y                                 |             | 6            | N                   |
|             | 2            | N                                 |             | 7            | N                   |
|             | 3            | N                                 |             | 8            | N                   |
|             | 4            | Y                                 |             | 9            | N                   |
|             | 5            | N                                 |             | 10           | N                   |
|             | 6            | N                                 |             | 11           | Y                   |
| #30         | 1            | N                                 |             | 12           | N                   |
|             | 2            | N                                 |             | 13           | N                   |
|             | 3            | N                                 |             | 14           | N                   |
|             | 4            | N                                 |             | 15           | N                   |
|             | 5            | N                                 |             | 16           | N                   |
|             | 6            | N                                 |             | 17           | N                   |
|             | 7            | N                                 |             | 18           | N                   |
|             | 8            | N                                 |             | 19           | N                   |
| #31         | 1            | N                                 | #34         | 1            | N                   |
|             | 2            | N                                 |             | 2            | N                   |
|             | 3            | Y                                 |             | 3            | Y                   |
|             | 4            | Y                                 | #35         | 1            | N                   |
|             | 5            | N                                 |             | 2            | N                   |
|             | 6            | Y                                 |             | 3            | N                   |
|             | 7            | Y                                 |             | 4            | Y                   |
|             | 8            | N                                 |             | 5            | N                   |
|             | 9            | Y                                 |             |              |                     |

Note: ※1; Resumed respiration phase-locked firing after ipsi-nostril obstruction  
Y; Yes, N; None
